# Supplementary material for: Comparison of Antibody Levels in Response to SARS-CoV-2 Infection and Vaccination Type in a Midwestern Cohort
Source: bioRxiv or medRxiv preprint supplement (doi:10.1101/2021.08.16.21262036), 2021-11-10
Supplement: Supplementary file [file media-1.pdf]

## Supplemental Figures

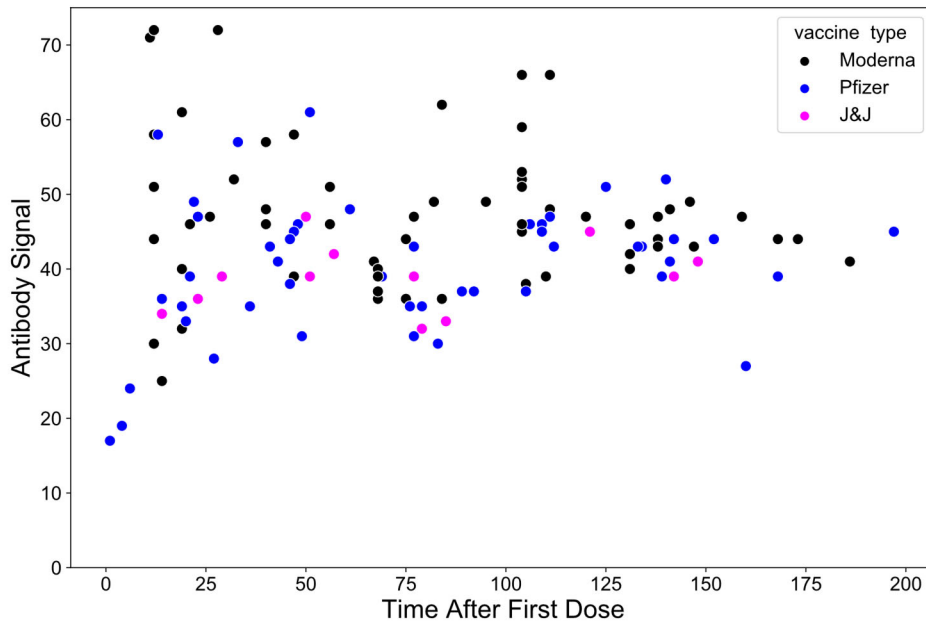

**Figure S1.** Anti-SARS-CoV-2 spike antibody (IgG) signal as a function of time for recovered individuals.

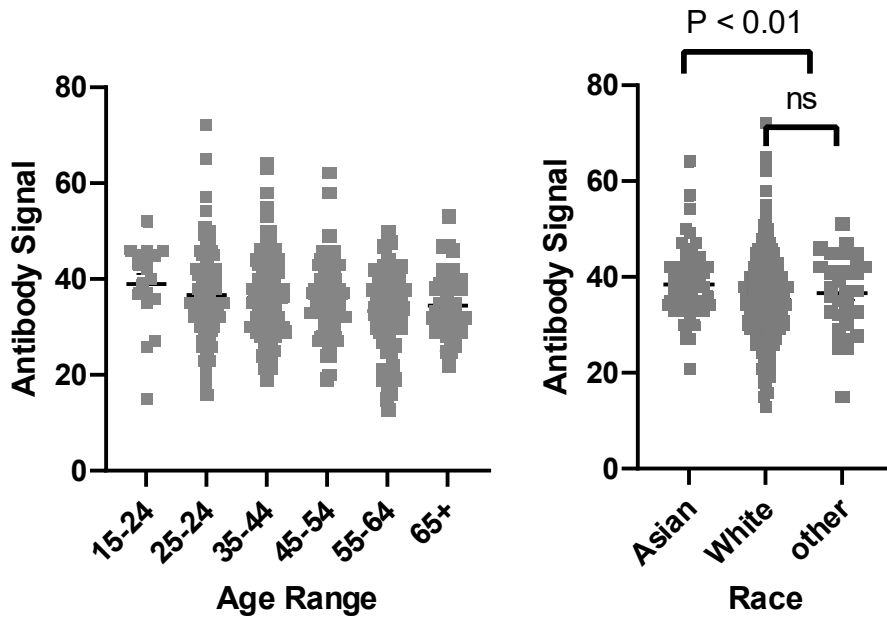

**Figure S2.** Anti-SARS-CoV-2 spike antibody (IgG) signal for individuals >20 days after first dose of Pfizer or Moderna as a function of individual age (left) and race (right). Participants identifying as Asian had a significantly higher antibody signal than White and combined other groups. Regression of signal with age gives a significant downward trend with slope = -0.09 and  $P < 0.001$ .

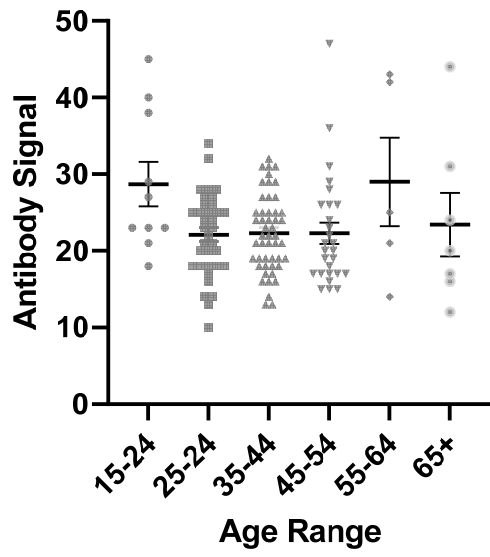

**Figure S3.** Anti-SARS-CoV-2 spike antibody (IgG) signal for recovered individuals as a function of age. ANOVA gives  $P = 0.049$  for differences but there is no clear trend for differences.

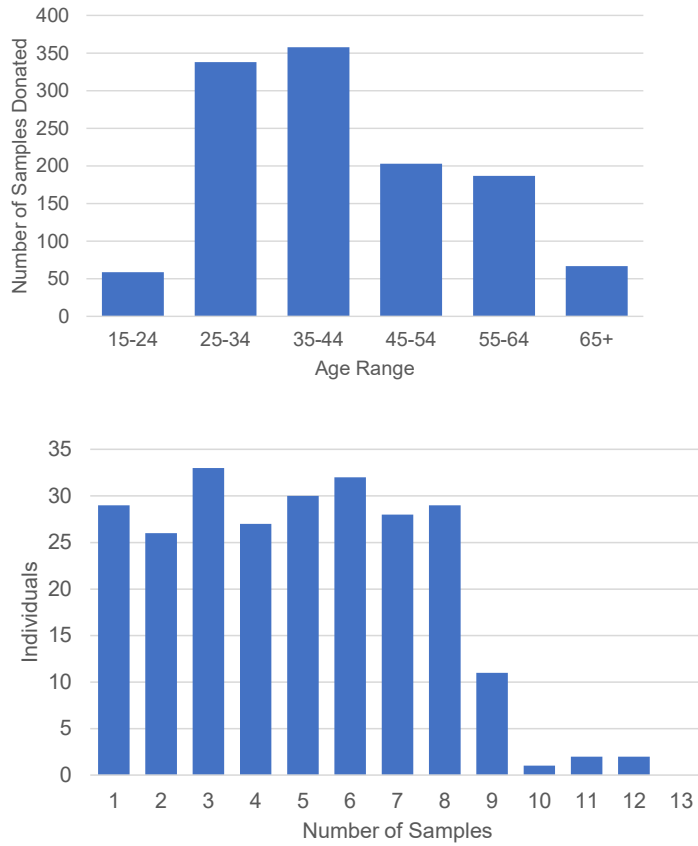

**Figure S4.** Numbers of participants giving samples as a function of reported age (top) and the distribution of individuals giving different numbers of samples (bottom).
